# Supplementary material for: B-cell immunity and vaccine induced antibody protection reveal the inefficacy of current vaccination schedule in infants with perinatal HIV-infection in Mozambique, Africa
Source: PubMed Central journal article supplement — eBioMedicine. 2023 Jul 3;93:104666. doi: 10.1016/j.ebiom.2023.104666 (PMC10363429; doi:10.1016/j.ebiom.2023.104666), 2023-07-03
Supplement: mmc1.pdf [file mmc1.pdf]

# STUDY DESIGN

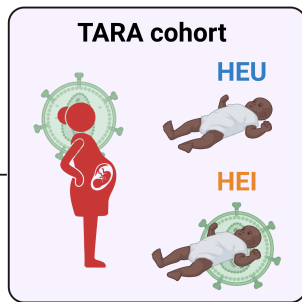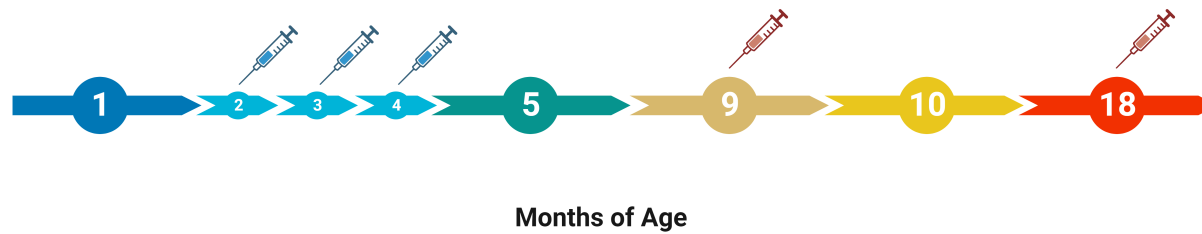

Entry

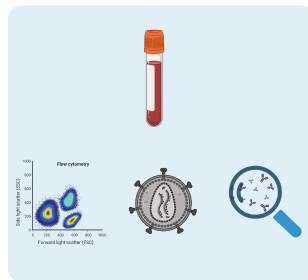

5 months

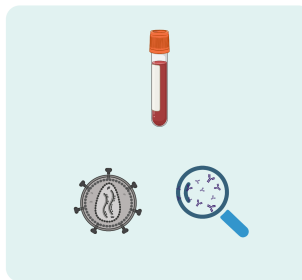

9-10 months

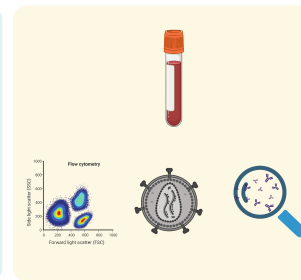

18 months

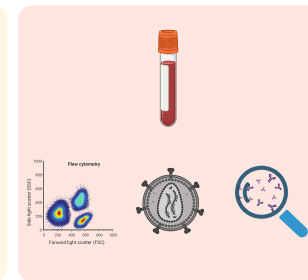

## Figure Legend

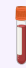

- Blood collection

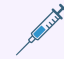

- Tetanus Vaccination

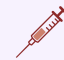

- Measles Vaccination

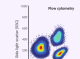

- B cells phenotypes

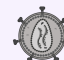

- HIV RNA

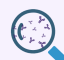

- TT Abs
- Measles Abs
- HIV Abs

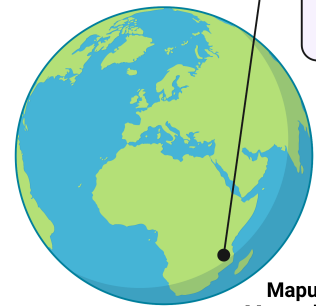

Maputo,  
Mozambique
