# Supplementary material for: B-cell immunity and vaccine induced antibody protection reveal the inefficacy of current vaccination schedule in infants with perinatal HIV-infection in Mozambique, Africa
Source: PubMed Central journal article supplement — eBioMedicine. 2023 Jul 3;93:104666. doi: 10.1016/j.ebiom.2023.104666 (PMC10363429; doi:10.1016/j.ebiom.2023.104666), 2023-07-03
Supplement: mmc6.pdf [file mmc6.pdf]

# HIV BLOT 2.2 PROTEIN FINDER

PAB0001-1

NOTE: This is intended as an aid for identification of HIV viral protein bands of MPD HIV BLOT 2.2. The viral protein bands are usually at a proportional distance similar but not necessarily identical to that on the diagram.

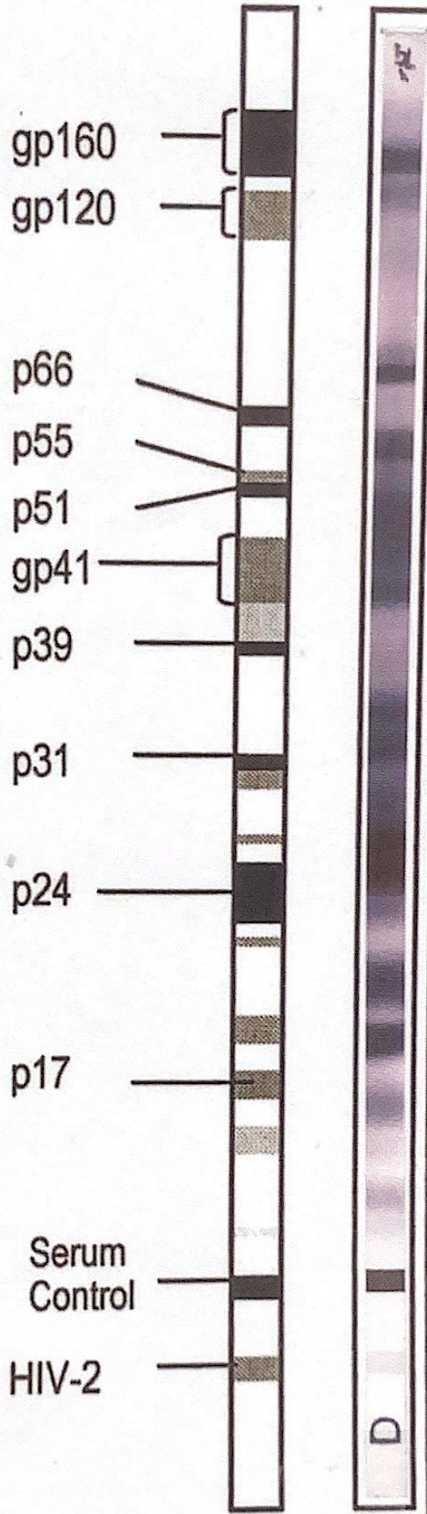

LOT 7L 17179

Run 2

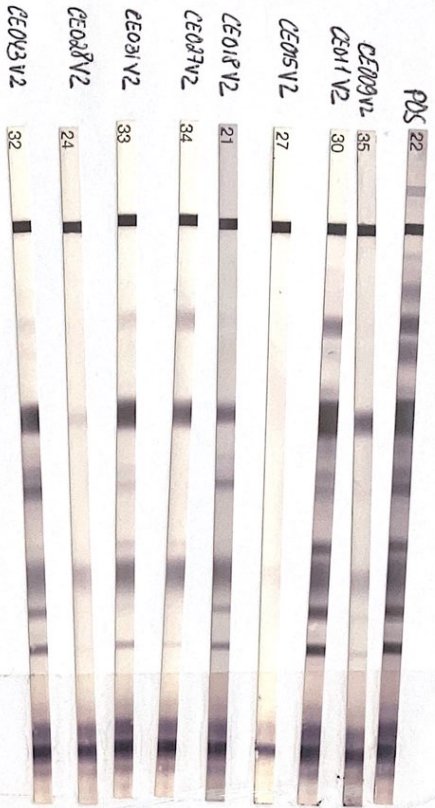

Run 1

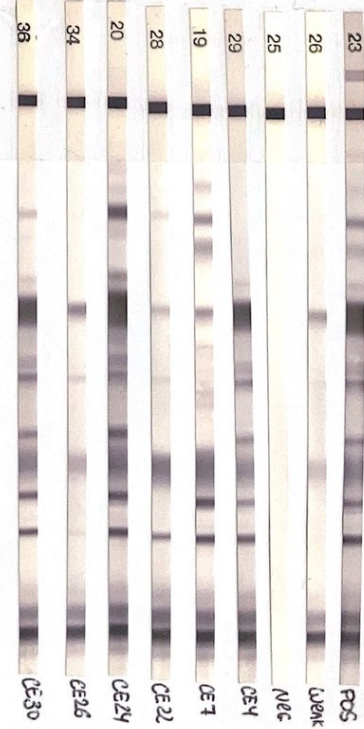

28.03.2022



28-4-22 Run - Repeat

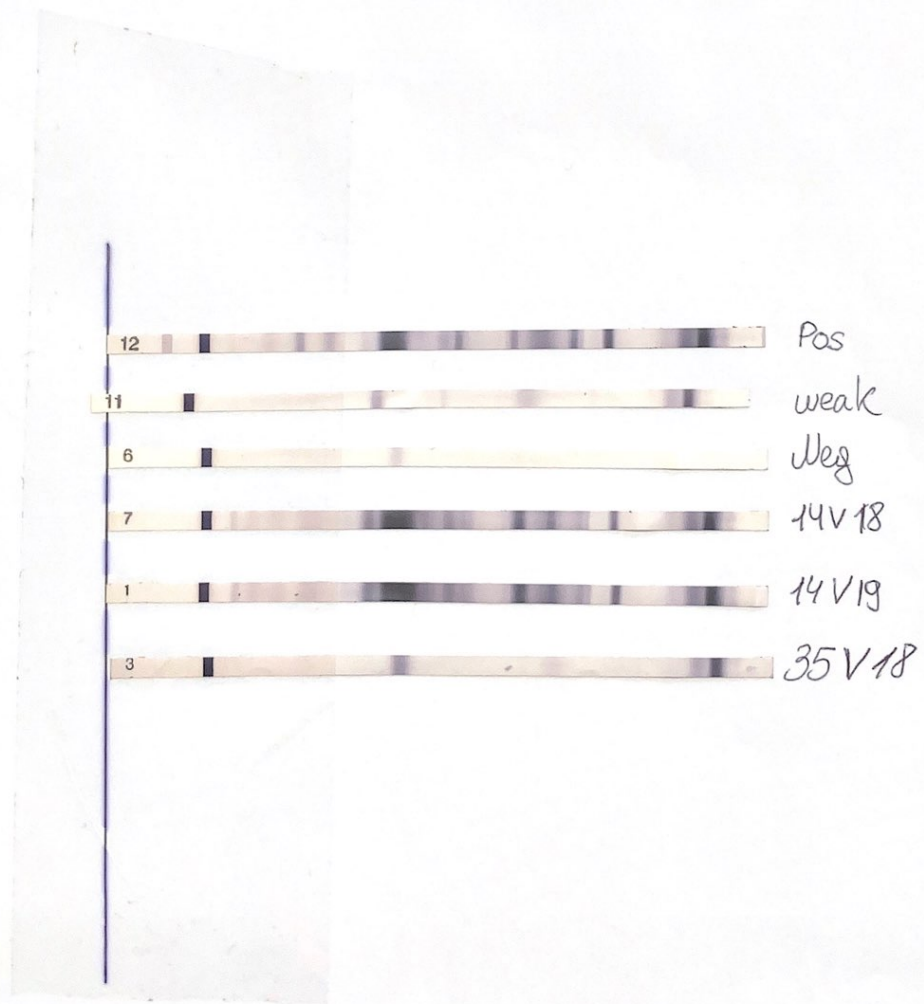

28-4-22 Run - Repeat

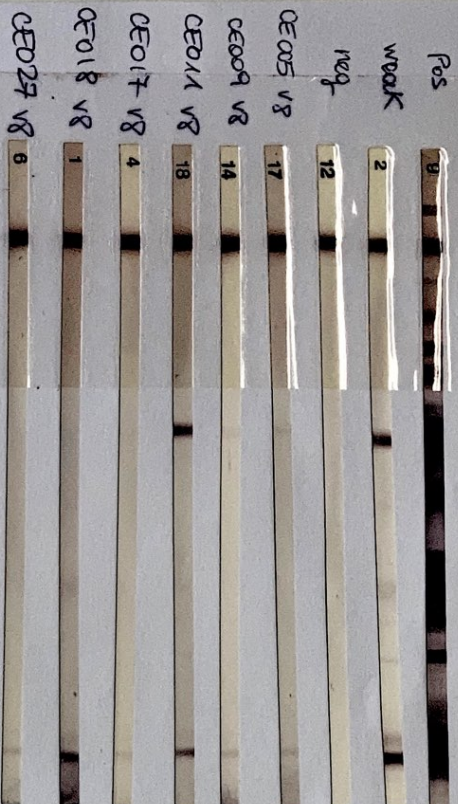

WB P01 02-02-2022

Vaschetta (1)

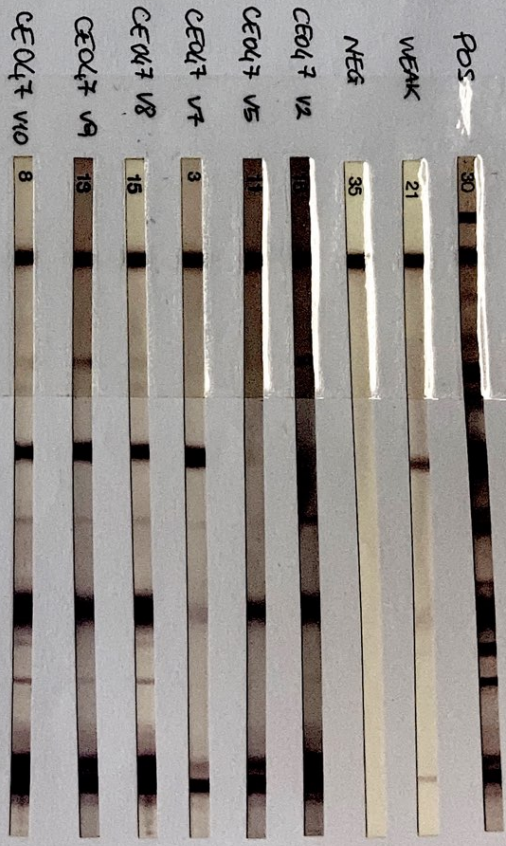

WB P01 - 01-02-2022



WB R01 13-01-2021

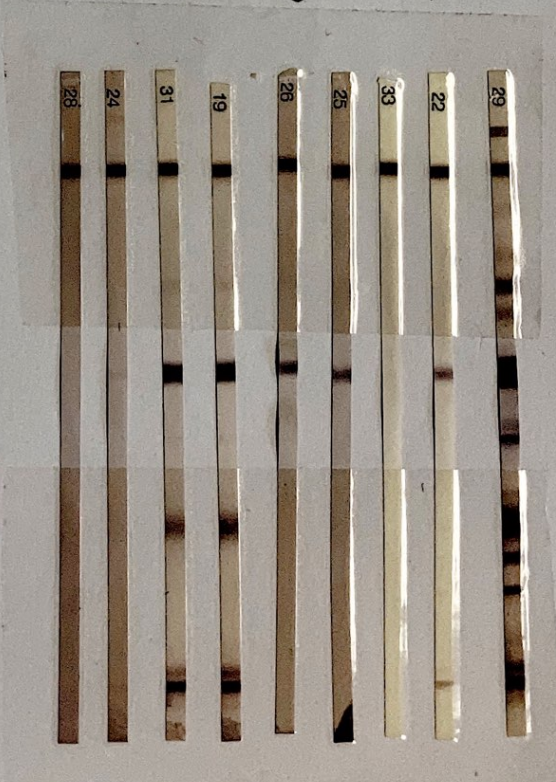

Pos  
WEEK  
NEG  
CP02, V9  
CP02, V10  
CP08 V9  
CP08 V10  
CP08 V7  
CP08 V8



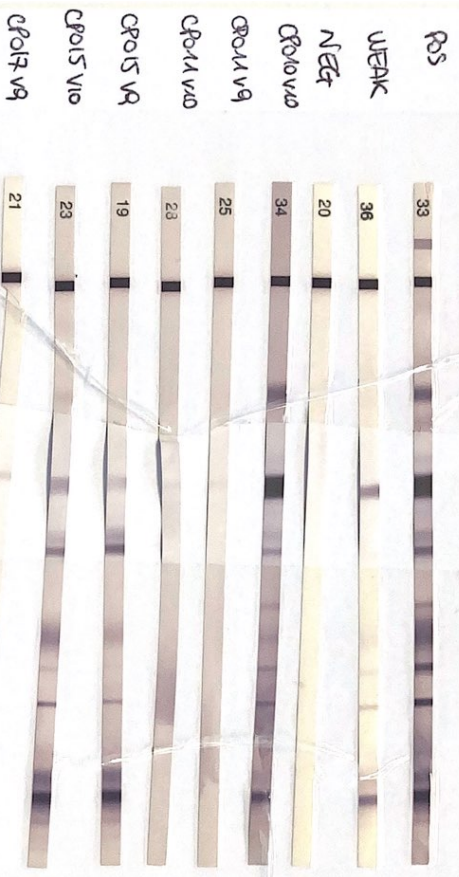

(1)

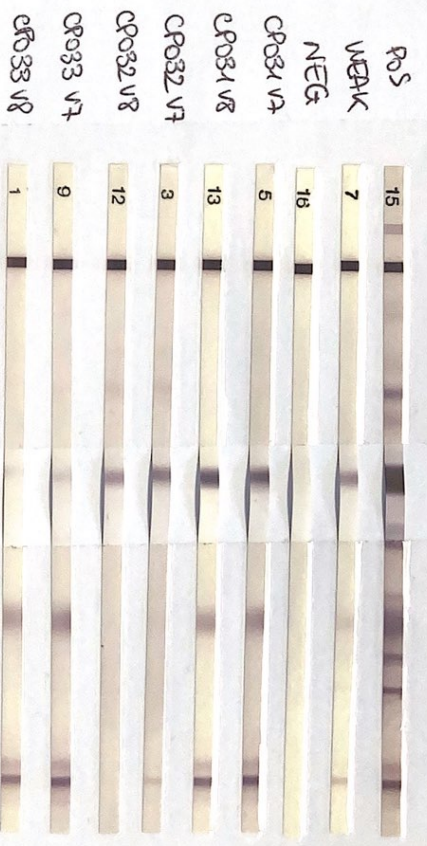

(1)

WB Rø1 24-11-2020

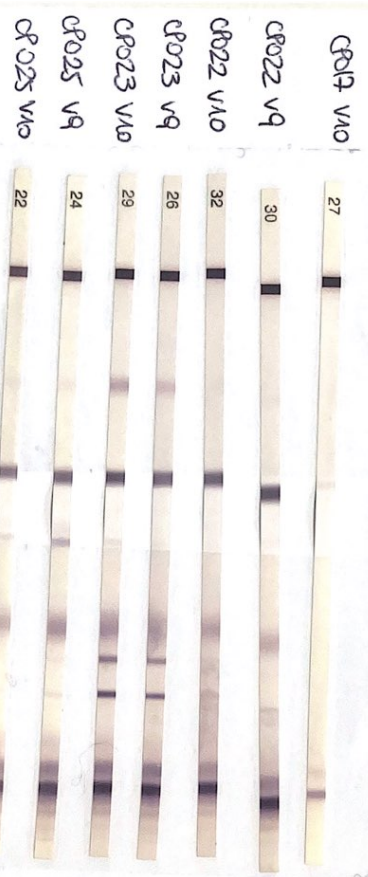

(5)

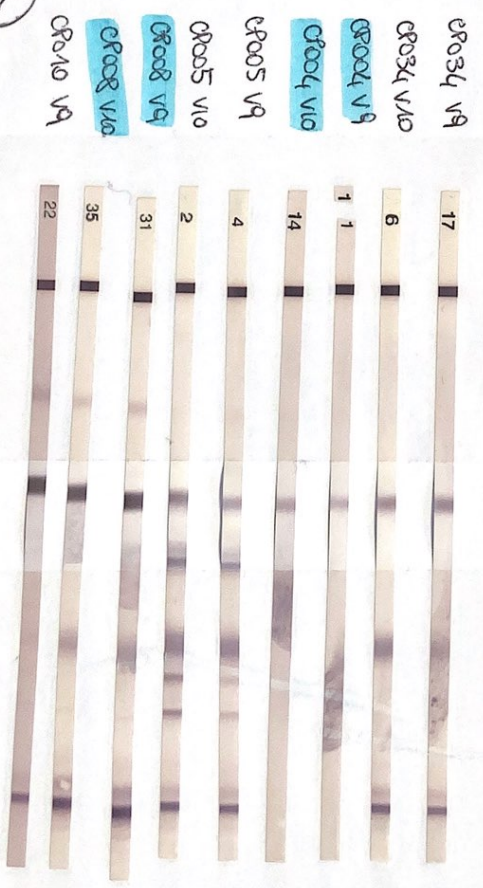

(2)



ROS  
NFE4  
CR037 V2  
CR037 V1  
CR037 V8  
CR038 V2  
CR038 V2

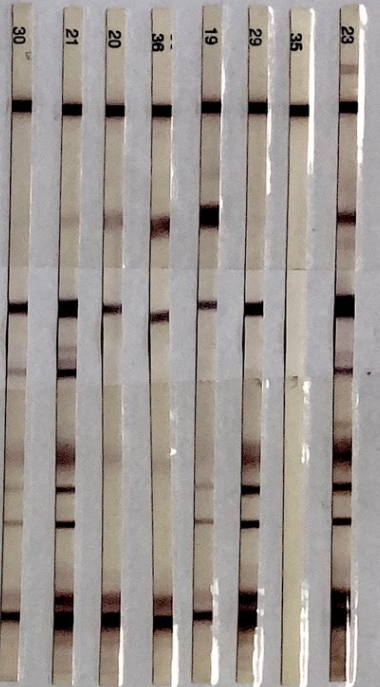

WB R01 10-12-2020

ROS  
WEAK  
NFE4  
CR035 V2  
CR035 V5  
CR036 V2  
CR036 V5  
CR036 V7  
CR036 V8

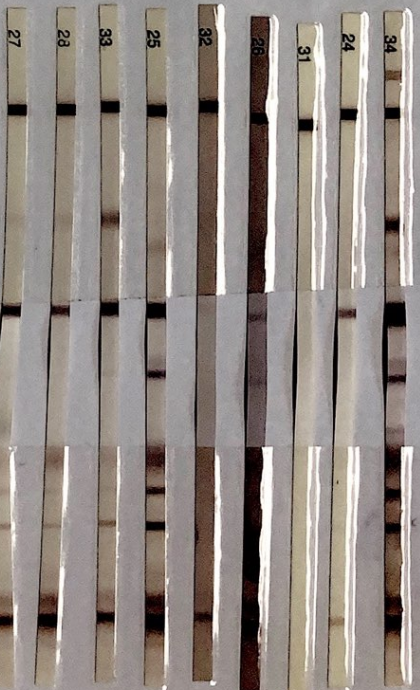

WB R01 02-12-2020



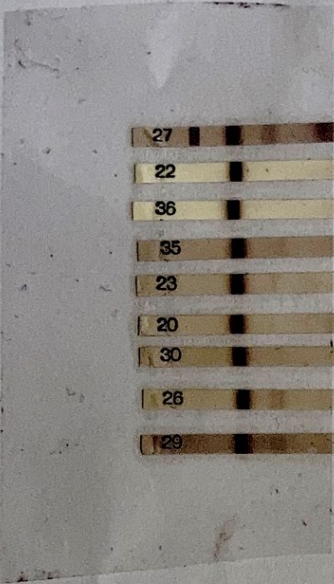

Pos  
 NEG  
 CP018 V7  
 CP018 V8  
 CP018 V9  
 CP018 V10  
 CP020 V7  
 CP020 V8

23.11.2020  
 negative

WB  
 RQ1

RUN1



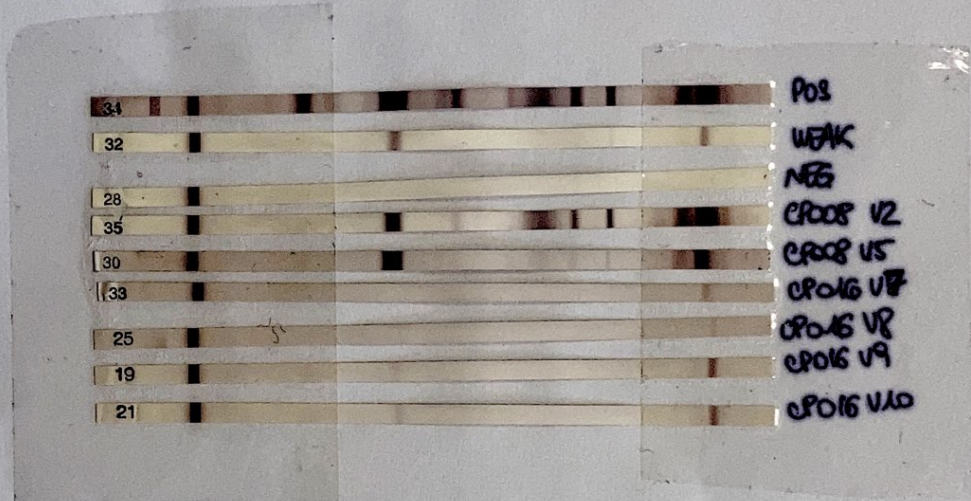

WB RPA

21.11.20



RUN 3

| Pos     | Pos |
|---------|-----|
| CE09 V2 | 35  |
| CE11 V2 | 24  |
| CE15 V1 | 27  |
| CE17 V2 | 33  |
| CE21 V2 | 21  |
| CE28 V2 | 30  |
| CE31 V1 | 32  |
| CE13 V1 | 22  |
|         | 31  |

RUN 1

| Pos     | Pos |
|---------|-----|
| NE6     | 14  |
| CE00 V2 | 18  |
| CE02 V2 | 10  |
| CE05 V2 | 7   |
| CE07 V2 | 4   |
| CE09 V2 | 19  |
| CE09 V2 | 3   |
| CE06 V2 | 6   |

RUN 2

| Pos     | Pos |
|---------|-----|
| CE20 V2 | 15  |
| CE21 V2 | 11  |
| CE23 V2 | 5   |
| CE25 V2 | 8   |
| CE32 V2 | 2   |
| CE33 V2 | 12  |
| CE34 V2 | 9   |
| CE35 V1 | 17  |

24/3/2022



4 POS  
 16 NEG  
 15 CP 26 V19  
 2 CP 27 V19  
 5 CP 28 V18  
 17 CP 28 V19

8 POS  
 15 W  
 10 NEG  
 5 CP 23 V18  
 16 CP 29 V18  
 18 CP 13 V18  
 13 CP 14 V18  
 12 CP 14 V18  
 26 CP 14 V18

25 POS  
 28 CP 14 V18  
 19 CP 14 V18  
 18 CP 20 V18  
 23 CP 21 V18  
 31 CP 25 V18  
 26 CP 25 V18  
 29 CP 25 V18

21.04.22



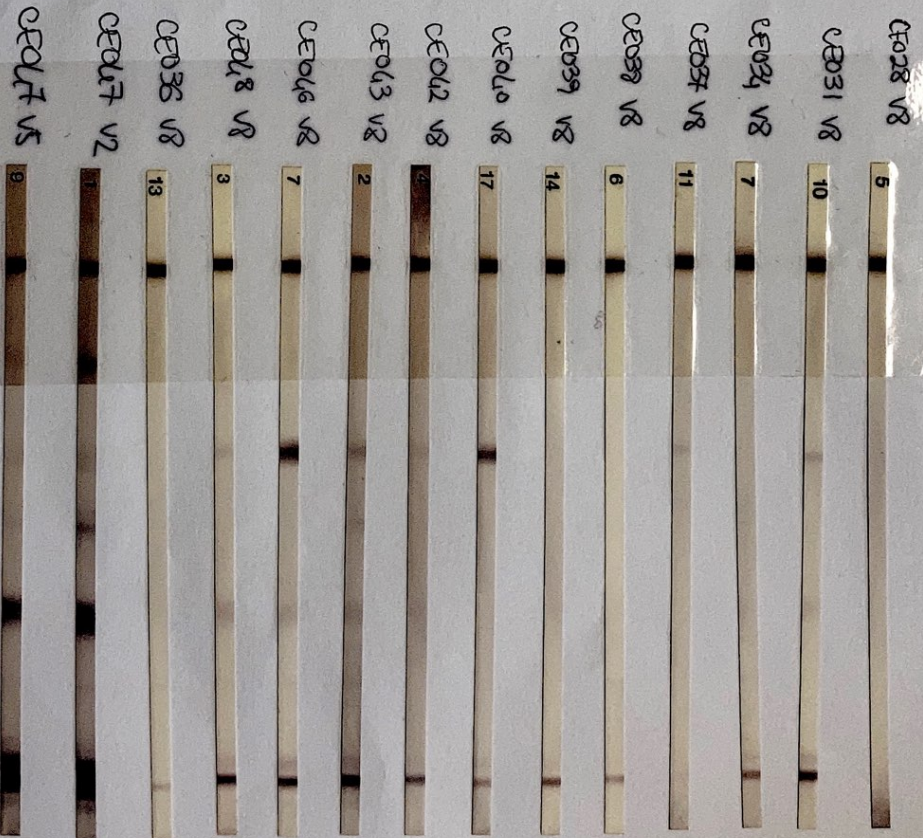

WB RØ1 02-02-22 vachetta 2 + 3



Pos  
Neg  
CE032  
CE033  
CE035  
CE041

|    |  |
|----|--|
| 94 |  |
| 32 |  |
| 36 |  |
| 27 |  |
| 20 |  |
| 23 |  |

RUN 28/6/21

Pos  
Neg  
CE002 VR  
CE004 VR  
CE009 VR  
CE012 VR  
CE014 VR  
CE016 VR  
CE020 VR

|    |  |
|----|--|
| 23 |  |
| 21 |  |
| 20 |  |
| 23 |  |
| 28 |  |
| 23 |  |
| 24 |  |
| 30 |  |
| 27 |  |

RUN 1 23/6/21

Pos  
Neg  
CE021 VR  
CE022 VR  
CE023 VR  
CE024 VR  
CE025 VR  
CE026 VR  
CE030 VR

|    |  |
|----|--|
| 22 |  |
| 20 |  |
| 31 |  |
| 32 |  |
| 36 |  |
| 34 |  |
| 35 |  |
| 28 |  |
| 19 |  |

RUN 2
