# Supplementary figures and images for: B-cell immunity and vaccine induced antibody protection reveal the inefficacy of current vaccination schedule in infants with perinatal HIV-infection in Mozambique, Africa
Source: PubMed Central journal article supplement — eBioMedicine. 2023 Jul 3;93:104666. doi: 10.1016/j.ebiom.2023.104666 (PMC10363429; doi:10.1016/j.ebiom.2023.104666), 2023-07-03

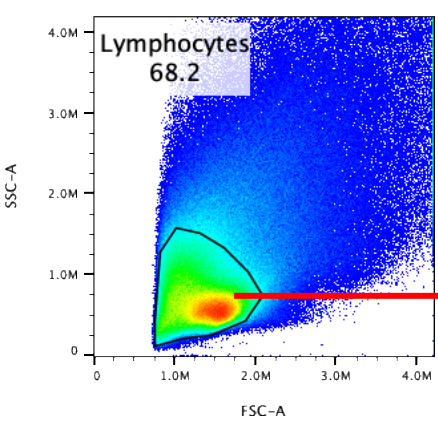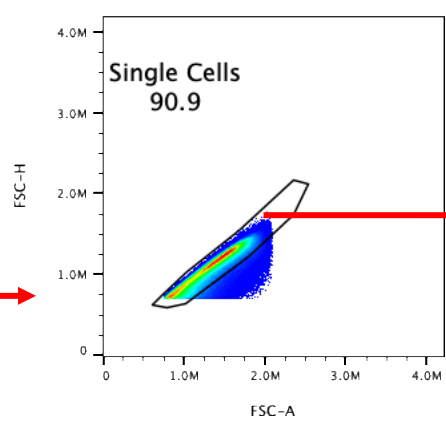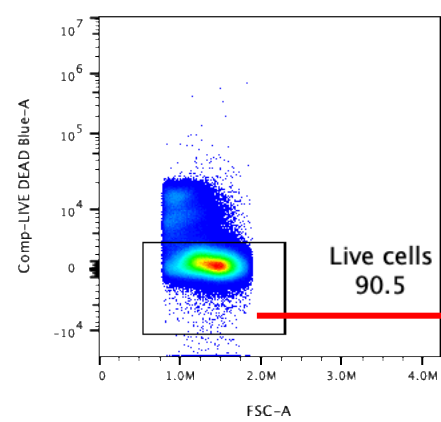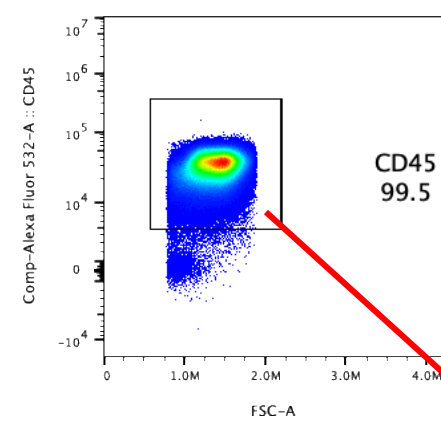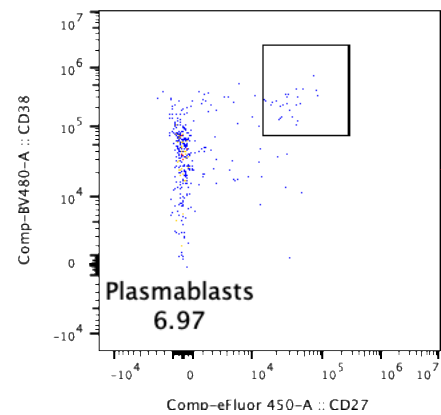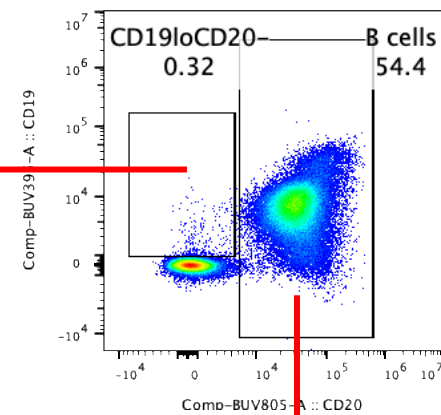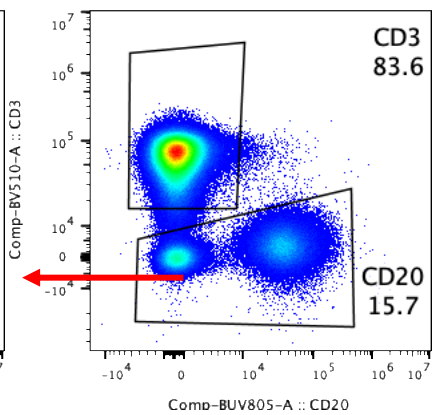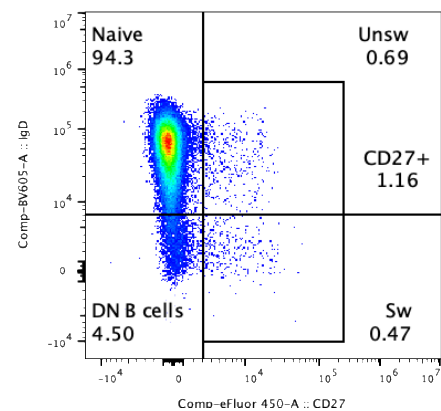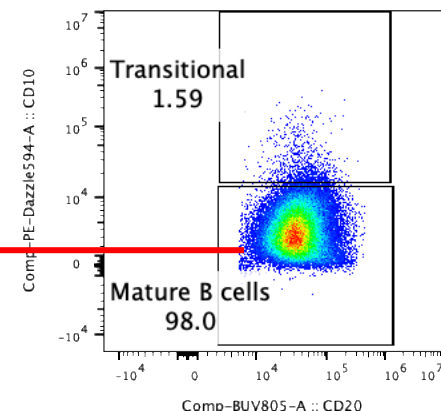

Supplement: mmc2.pdf [file mmc2.pdf]

A

## Durability of Tetanous Serology

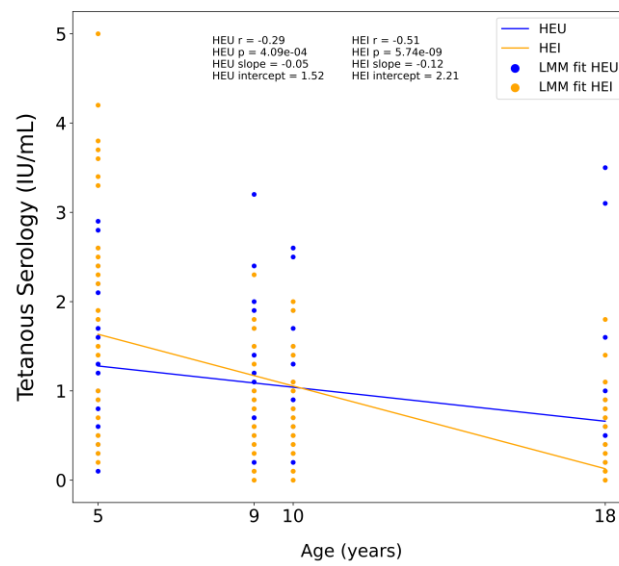

B

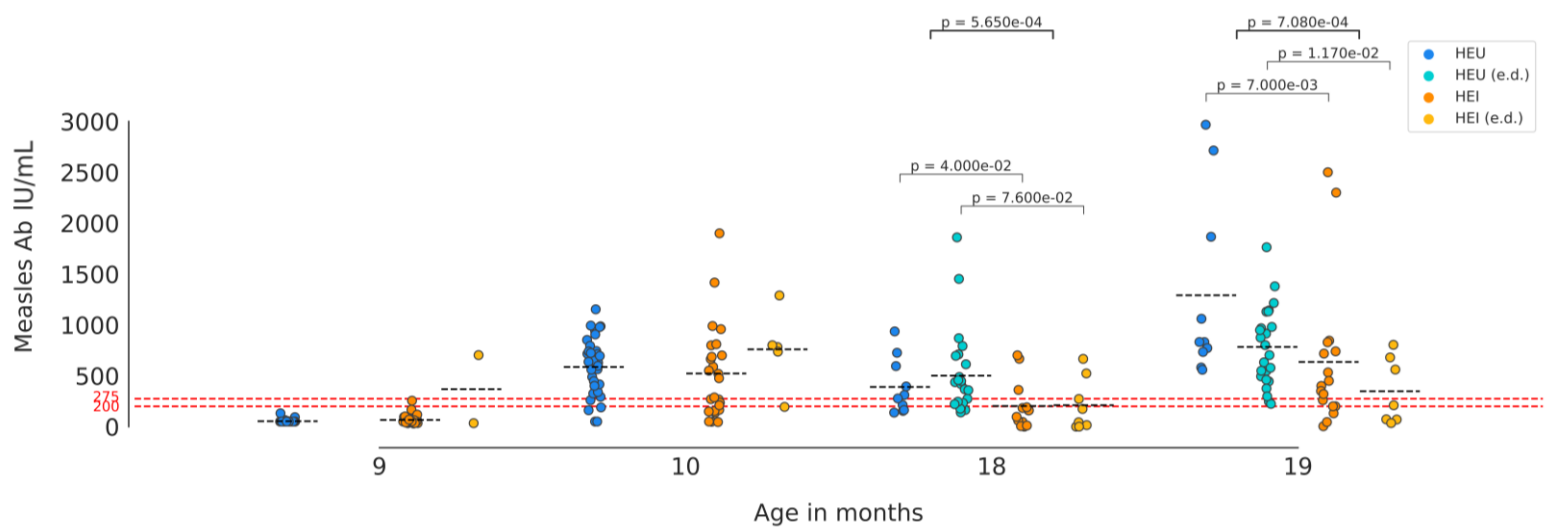

C

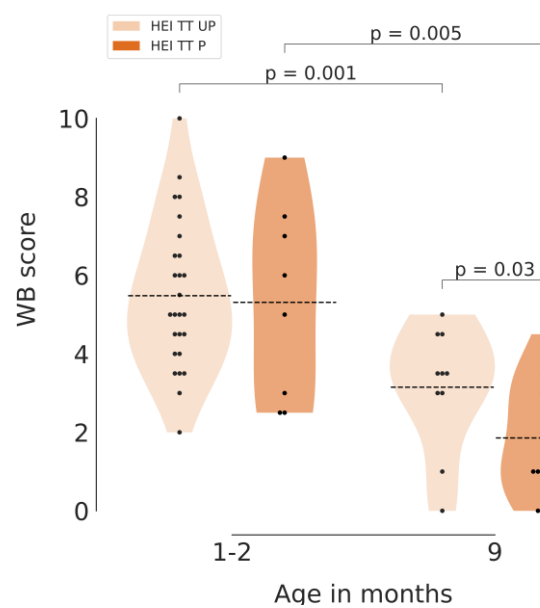

Supplement: mmc3.pdf [file mmc3.pdf]

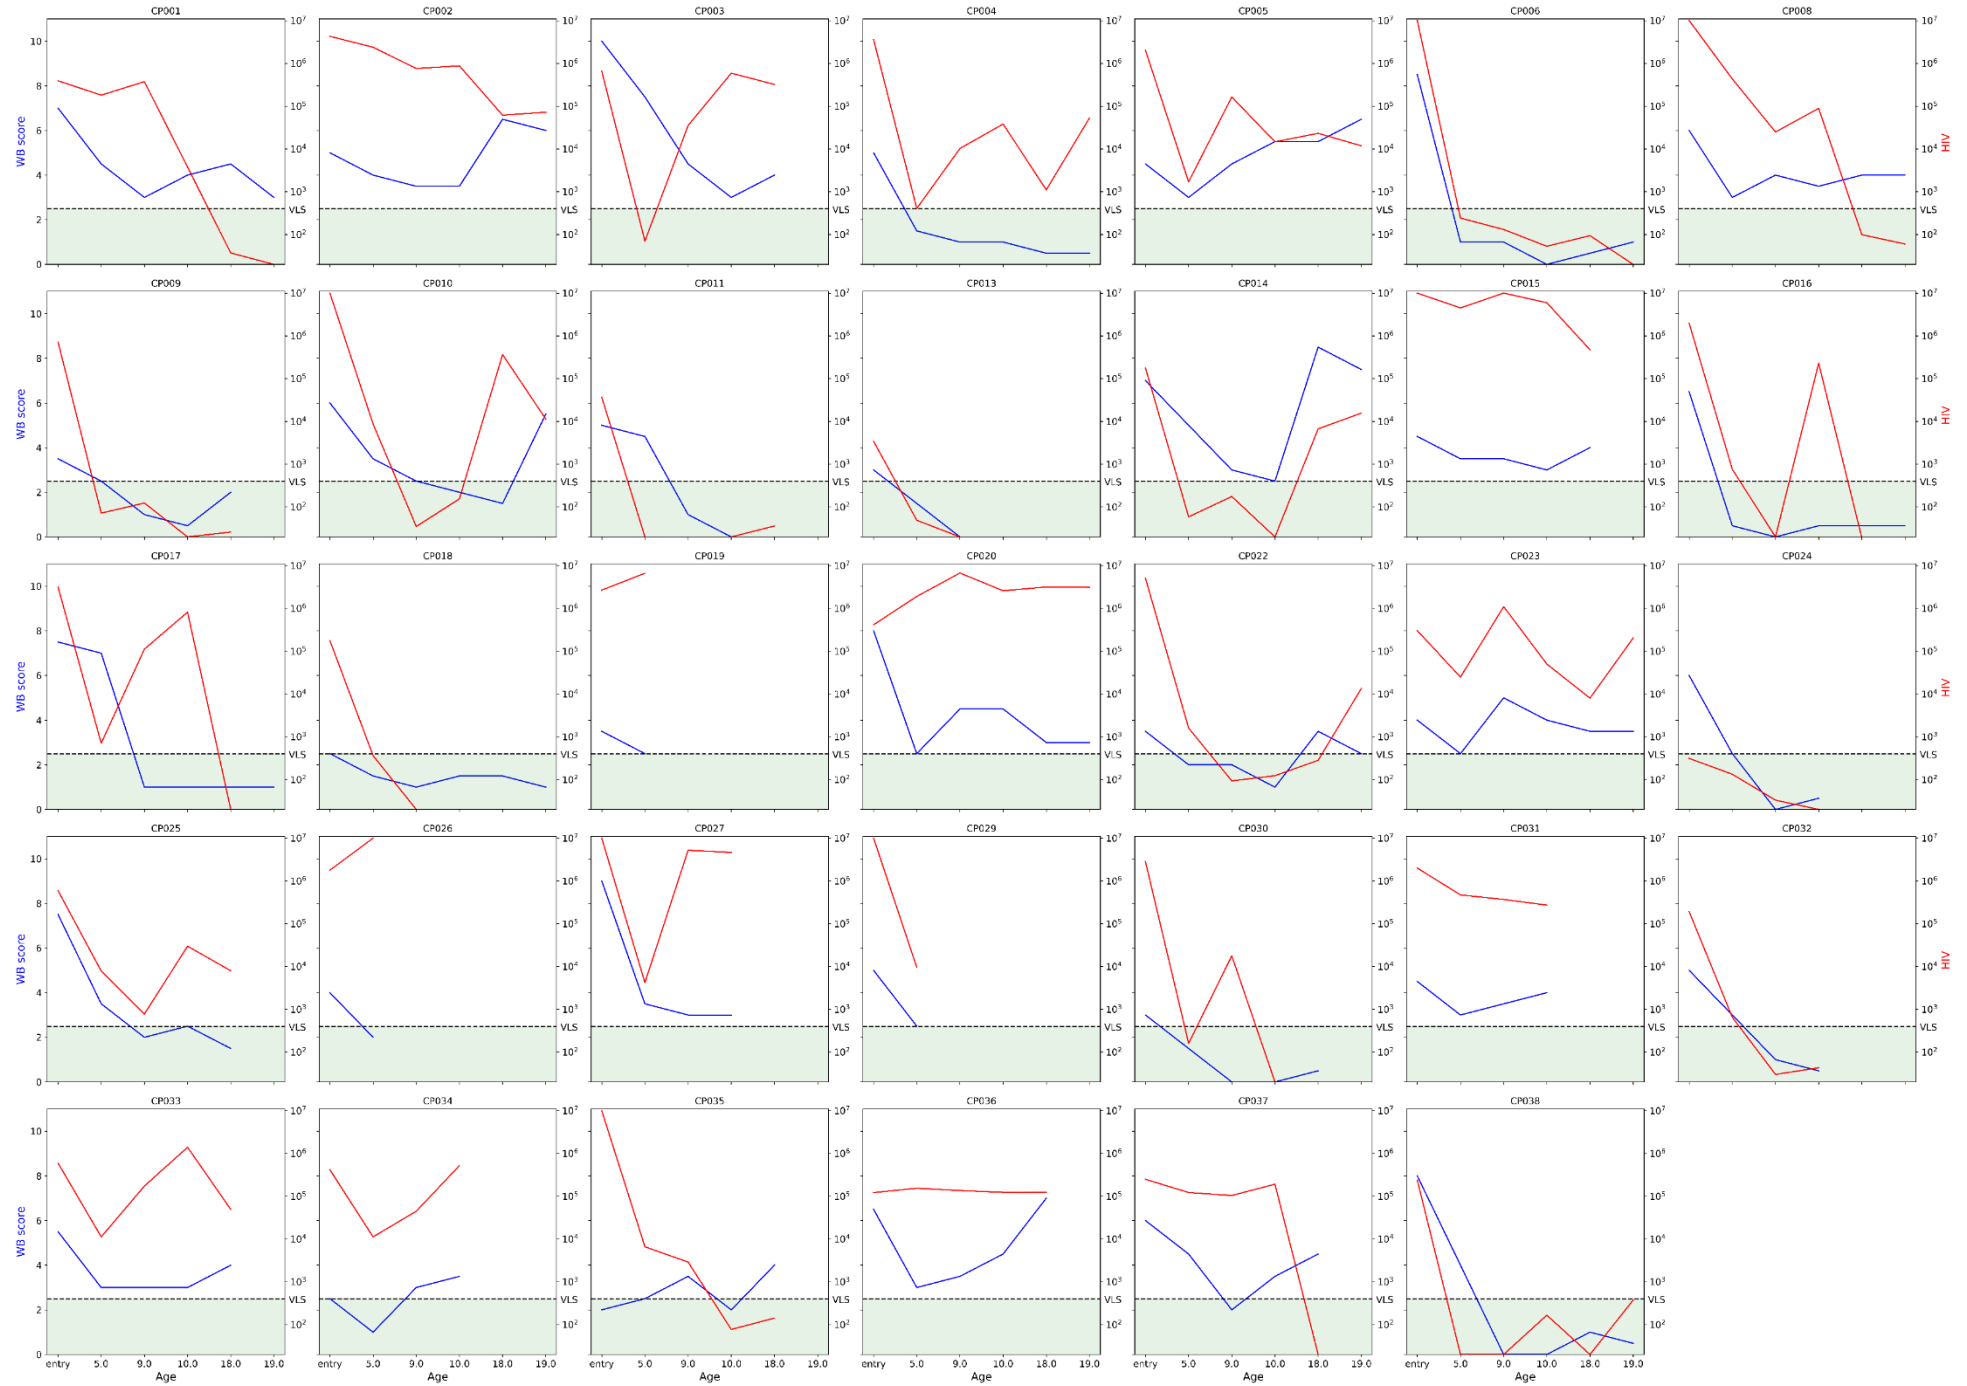

Supplement: mmc4.pdf [file mmc4.pdf]

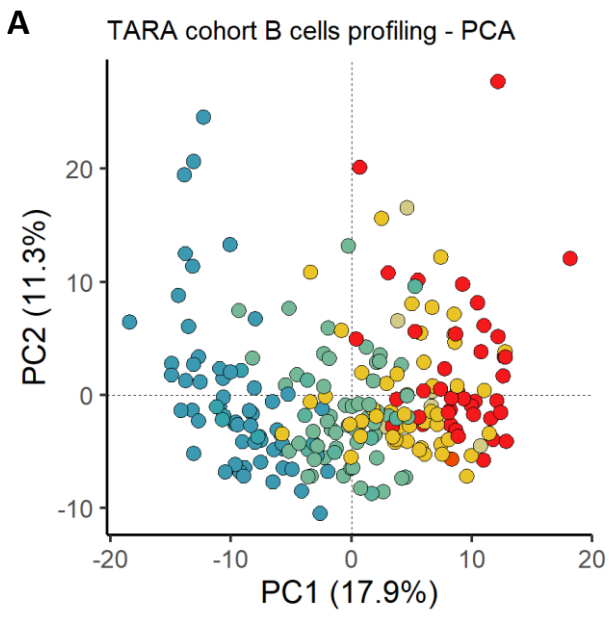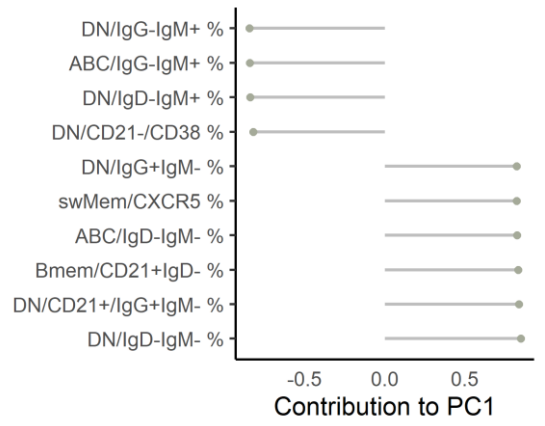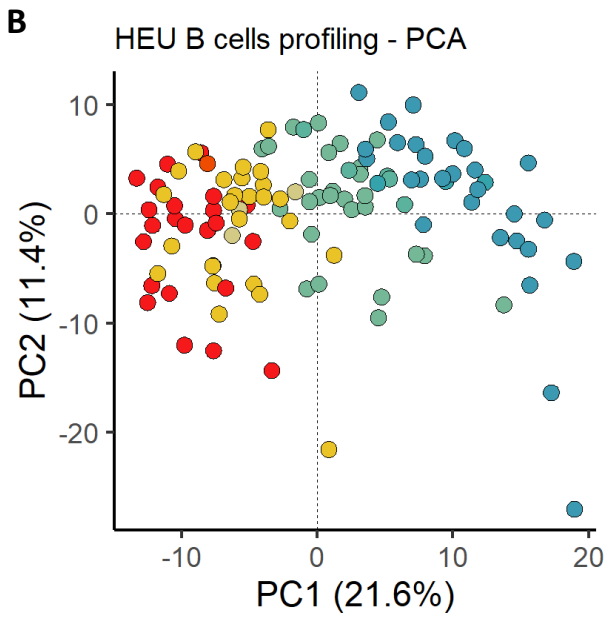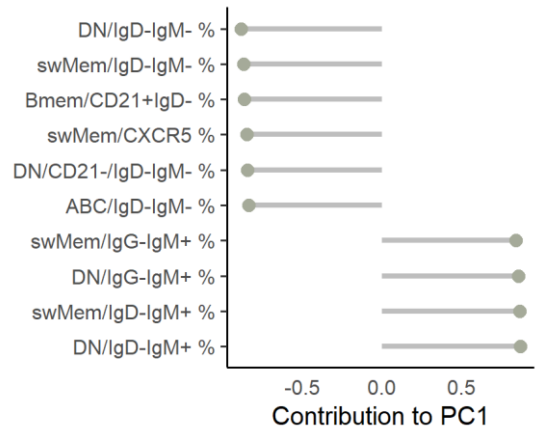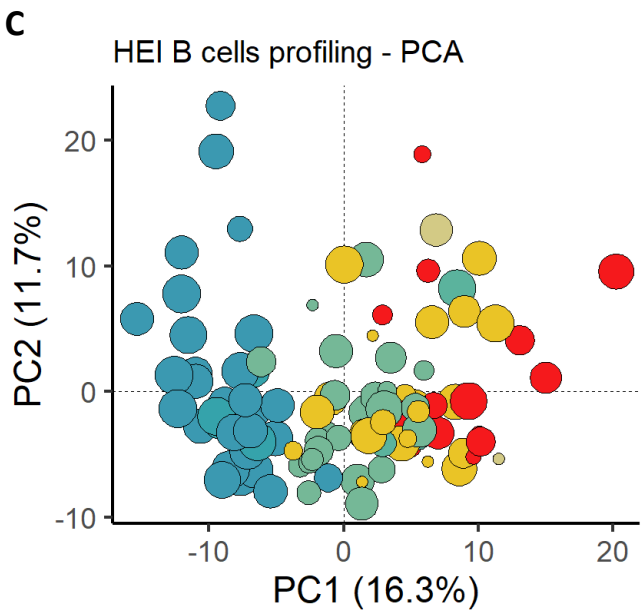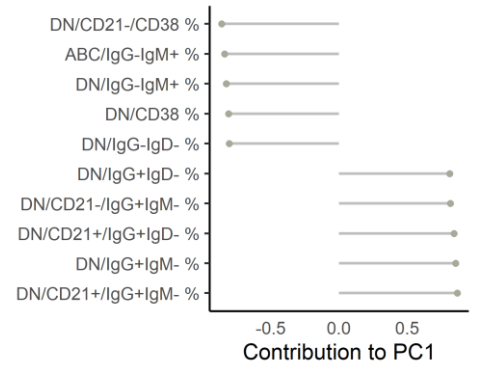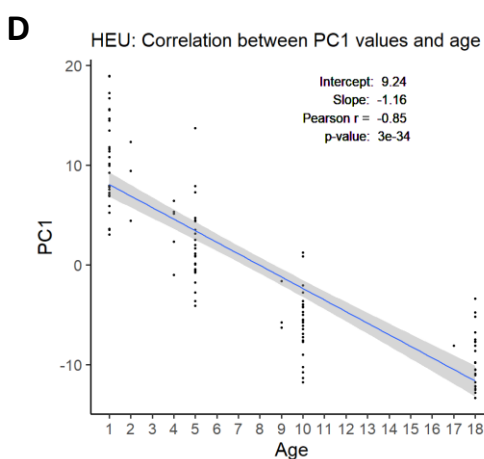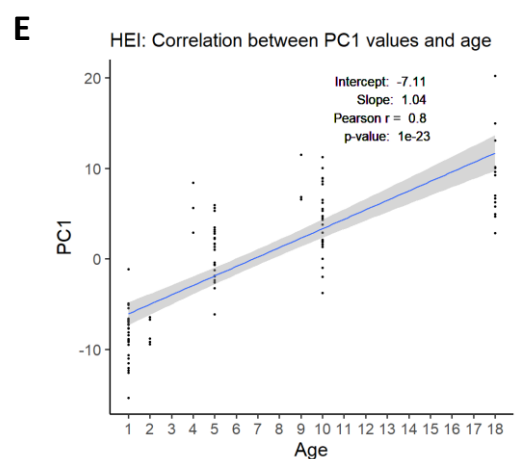

Supplement: mmc5.pdf [file mmc5.pdf]
